# Supplementary material
Source: PubMed Central journal article supplement (PMC6868599)
Supplement: ao8b03100_si_001.pdf [file ao8b03100_si_001.pdf]

## **Supporting Information**

### **Intelligent Design of 14-3-3 Docking Proteins Utilizing Synthetic Evolution**

#### **Artificial Intelligence (SYN-AI)**

Leroy K. Davis <sup>1,2</sup>

<sup>1</sup> Prairie View A & M University, Cooperative Agricultural Research Center (CARC), 700 University Drive, Prairie View, Texas 77446-0518

<sup>2</sup> Gene Evolution Project, LLC, [geneevolutionproject@gmail.com](mailto:geneevolutionproject@gmail.com), [lkdavis.phd@gmail.com](mailto:lkdavis.phd@gmail.com)

---

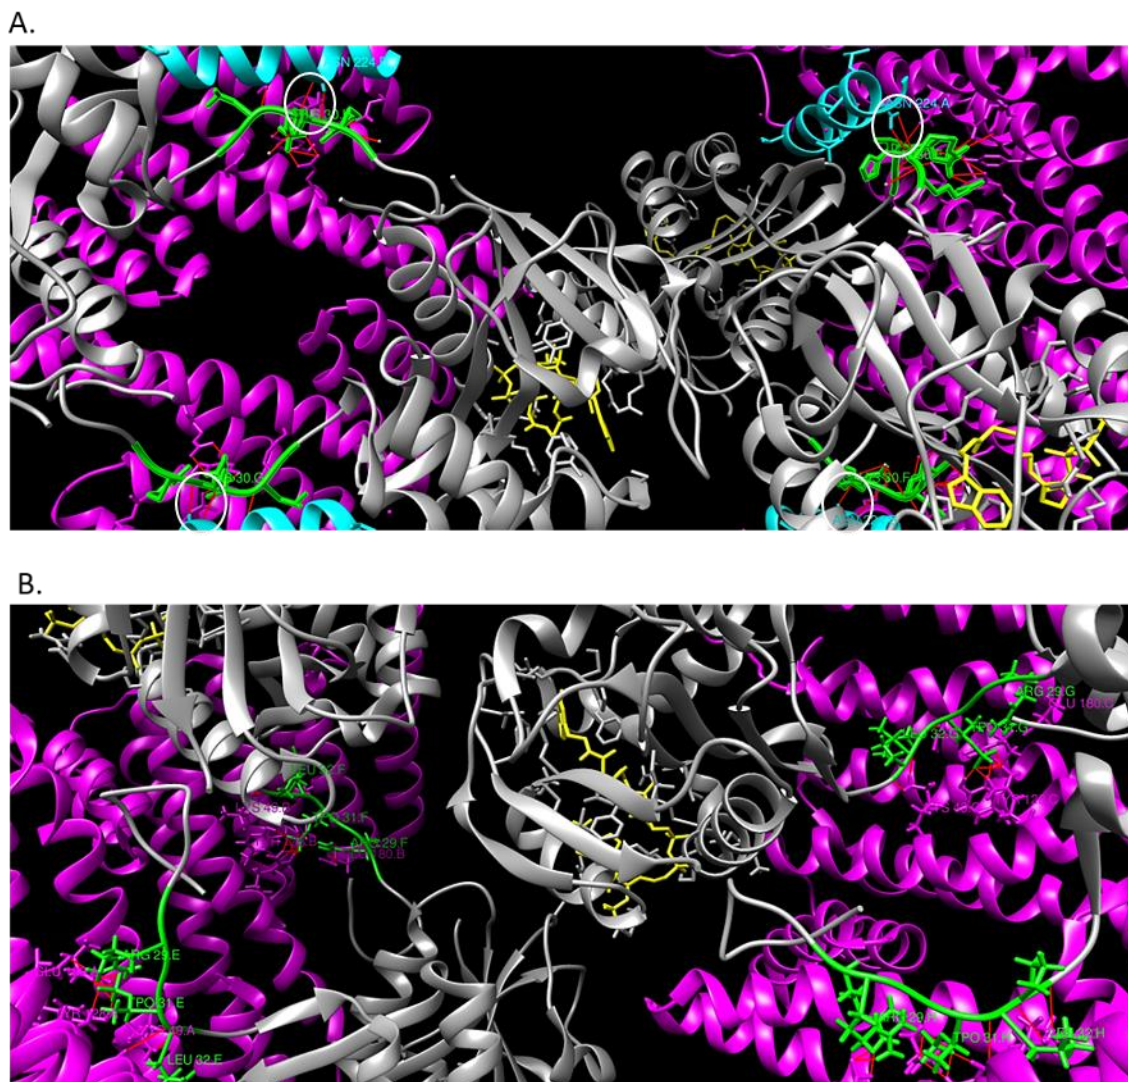

**Figure S1. 14-3-3  $\zeta$  serotonin N-acetyl transferase hydrogen bonding.** Native 14-3-3 serotonin N-acetyl transferase structure is reported in <sup>75</sup>, (A). The SYN-AI-1 serotonin N-acetyl transferase complex was built utilizing UCSF Chimera. Native rotamers were mutated to those characterizing SYN-AI-1 and residues 215 – 228 of chains A – D deleted. Corrected structures were obtained by performing energy minimization utilizing AMBER. Wherein, 100 steepest descent steps were performed on each chain of the octamer followed by 10 conjugate gradient steps. The process was repeated until a good structure was obtained. Energy minimization was then performed on the entire complex utilizing 200 steepest descent steps followed by 10 conjugate gradient steps, (B).

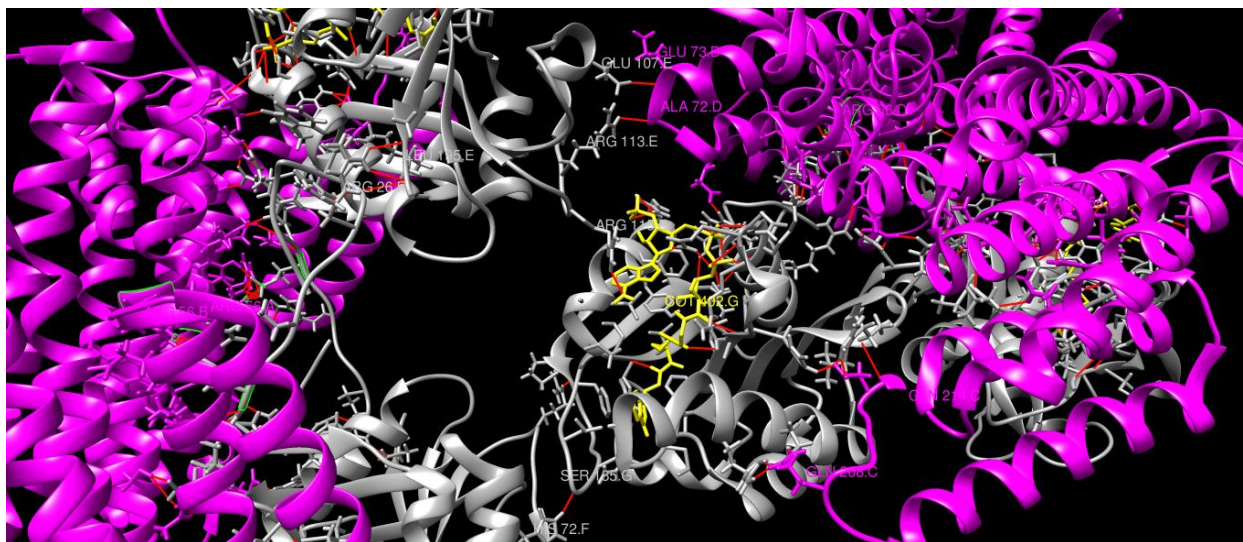

**Figure S2. Serotonin N-acetyl Transferase Hydrogen Bond Formation.** UCSF Chimera was utilized to build the SYN-AI-1 AANAT complex from the native crystal structure reported in 75. Rotamers of the native structure were mutated to those characterizing SYN-AI-1 and C' terminal residues 215-228 deleted. Energy minimization was performed utilizing Amber until. Hydrogen bond formation was analyzed at a Van der Waals overlap distance of  $\geq 0.6 \text{ \AA}$  with a correction of  $0.5 \text{ \AA}$  subtracted for potential hydrogen bonding pairs. Contacts or clashes of less than four bonds apart were excluded.

**Table S.1** Hydrogen bonding between the serotonin N-acetyl transferase conserved [RRHTLP] motif and the native 14-3-3  $\zeta$  tetramer were analyzed utilizing UCSF Chimera.

|     |           |     |      |     |     |            |       |       |
|-----|-----------|-----|------|-----|-----|------------|-------|-------|
| WAT | 6328 O    | ARG | 28.E | O   | WAT | 6328 H2    | 3.276 | 2.505 |
| LYS | 49.A NZ   | LEU | 32.E | O   | LYS | 49.A HZ1   | 2.758 | 1.919 |
| LYS | 49.A NZ   | PRO | 33.E | O   | LYS | 49.A HZ3   | 2.788 | 2.132 |
| ARG | 56.A NH1  | TPO | 31.E | O2P | ARG | 56.A HH12  | 2.851 | 2.005 |
| ARG | 56.A NH1  | TPO | 31.E | O3P | ARG | 56.A HH12  | 2.767 | 1.85  |
| ARG | 56.A NH2  | TPO | 31.E | O1P | ARG | 56.A HH22  | 2.744 | 1.762 |
| ARG | 56.A NH2  | TPO | 31.E | O2P | ARG | 56.A HH22  | 2.938 | 2.16  |
| ARG | 56.A NH2  | TPO | 31.E | O3P | ARG | 56.A HH22  | 3.322 | 2.519 |
| ARG | 127.A NH2 | TPO | 31.E | O1P | ARG | 127.A HH21 | 2.862 | 1.847 |
| ARG | 127.A NH2 | TPO | 31.E | O3P | ARG | 127.A HH21 | 3.051 | 2.344 |
| TYR | 128.A OH  | TPO | 31.E | O3P | TYR | 128.A HH   | 2.643 | 1.666 |
| LYS | 49.B NZ   | LEU | 32.F | O   | LYS | 49.B HZ1   | 2.773 | 1.973 |
| LYS | 49.B NZ   | PRO | 33.F | O   | LYS | 49.B HZ2   | 2.745 | 2.028 |
| ARG | 56.B NH1  | TPO | 31.F | O2P | ARG | 56.B HH12  | 2.862 | 2.034 |
| ARG | 56.B NH1  | TPO | 31.F | O3P | ARG | 56.B HH12  | 2.759 | 1.834 |
| ARG | 56.B NH2  | TPO | 31.F | O1P | ARG | 56.B HH22  | 2.788 | 1.814 |
| ARG | 56.B NH2  | TPO | 31.F | O2P | ARG | 56.B HH22  | 2.865 | 2.081 |
| ARG | 56.B NH2  | TPO | 31.F | O3P | ARG | 56.B HH22  | 3.289 | 2.481 |
| ARG | 127.B NE  | TPO | 31.F | O1P | ARG | 127.B HE   | 3.267 | 2.411 |
| ARG | 127.B NH2 | TPO | 31.F | O1P | ARG | 127.B HH21 | 2.878 | 1.894 |
| ARG | 127.B NH2 | TPO | 31.F | O3P | ARG | 127.B HH21 | 2.98  | 2.194 |
| TYR | 128.B OH  | TPO | 31.F | O3P | TYR | 128.B HH   | 2.644 | 1.667 |

|     |           |     |      |       |     |            |       |       |
|-----|-----------|-----|------|-------|-----|------------|-------|-------|
| LYS | 49.C NZ   | LEU | 32.G | O     | LYS | 49.C HZ1   | 2.724 | 1.869 |
| LYS | 49.C NZ   | PRO | 33.G | O     | LYS | 49.C HZ3   | 2.767 | 2.037 |
| ARG | 56.C NH1  | TPO | 31.G | O2P   | ARG | 56.C HH12  | 2.823 | 1.959 |
| ARG | 56.C NH1  | TPO | 31.G | O3P   | ARG | 56.C HH12  | 2.786 | 1.882 |
| ARG | 56.C NH2  | TPO | 31.G | O1P   | ARG | 56.C HH22  | 2.723 | 1.739 |
| ARG | 56.C NH2  | TPO | 31.G | O2P   | ARG | 56.C HH22  | 3.008 | 2.234 |
| ARG | 56.C NH2  | TPO | 31.G | O3P   | ARG | 56.C HH22  | 3.302 | 2.496 |
| ARG | 127.C NH2 | TPO | 31.G | O1P   | ARG | 127.C HH21 | 2.846 | 1.819 |
| TYR | 128.C OH  | TPO | 31.G | O3P   | TYR | 128.C HH   | 2.649 | 1.67  |
| LYS | 49.D NZ   | LEU | 32.H | O     | LYS | 49.D HZ1   | 2.806 | 2.05  |
| LYS | 49.D NZ   | PRO | 33.H | O     | LYS | 49.D HZ3   | 2.737 | 2.002 |
| ARG | 56.D NH1  | TPO | 31.H | O2P   | ARG | 56.D HH12  | 2.865 | 2.048 |
| ARG | 56.D NH1  | TPO | 31.H | O3P   | ARG | 56.D HH12  | 2.749 | 1.825 |
| ARG | 56.D NH2  | TPO | 31.H | O1P   | ARG | 56.D HH22  | 2.818 | 1.844 |
| ARG | 56.D NH2  | TPO | 31.H | O2P   | ARG | 56.D HH22  | 2.866 | 2.097 |
| ARG | 56.D NH2  | TPO | 31.H | O3P   | ARG | 56.D HH22  | 3.223 | 2.406 |
| ARG | 127.D NE  | TPO | 31.H | O1P   | ARG | 127.D HE   | 3.145 | 2.222 |
| ARG | 127.D NH2 | TPO | 31.H | O1P   | ARG | 127.D HH21 | 3.024 | 2.088 |
| ARG | 127.D NH2 | TPO | 31.H | O3P   | ARG | 127.D HH21 | 2.92  | 2.059 |
| TYR | 128.D OH  | TPO | 31.H | O3P   | TYR | 128.D HH   | 2.681 | 1.71  |
| ARG | 29.E NH1  | GLU | 180  | A OE2 | ARG | 29.E HH11  | 2.726 | 1.766 |
| LEU | 32.E N    | ASN | 173  | A OD1 | LEU | 32.E H     | 2.849 | 1.841 |
| ARG | 28.F NH2  | GLU | 180  | B OE1 | ARG | 28.F HH21  | 3.003 | 2.142 |
| ARG | 28.F NH2  | GLU | 180  | B OE2 | ARG | 28.F HH21  | 3.245 | 2.288 |
| ARG | 29.F NH1  | GLU | 180  | B OE2 | ARG | 29.F HH11  | 2.748 | 1.804 |
| LEU | 32.F N    | ASN | 173  | B OD1 | LEU | 32.F H     | 2.858 | 1.853 |
| ARG | 29.G NH1  | GLU | 180  | C OE2 | ARG | 29.G HH11  | 2.694 | 1.746 |
| LEU | 32.G N    | ASN | 173  | C OD1 | LEU | 32.G H     | 2.873 | 1.868 |
| ARG | 28.H NE   | GLU | 180  | D OE2 | ARG | 28.H HE    | 3.08  | 2.16  |
| ARG | 28.H NH2  | GLU | 180  | D OE1 | ARG | 28.H HH21  | 2.724 | 1.713 |
| ARG | 28.H NH2  | GLU | 180  | D OE2 | ARG | 28.H HH21  | 3.267 | 2.466 |
| ARG | 29.H NH1  | GLU | 180  | D OE2 | ARG | 29.H HH11  | 2.783 | 1.876 |
| LEU | 32.H N    | ASN | 173  | D OD1 | LEU | 32.H H     | 2.856 | 1.855 |

**Table S.2.** Hydrogen bonding between the Serotonin N-acetyl transferase conserved [RRHTLP] motif and the native 14-3-3  $\zeta$  tetramer were analyzed utilizing UCSF Chimera.

|     |           |     |      |       |     |            |       |       |
|-----|-----------|-----|------|-------|-----|------------|-------|-------|
| LYS | 49.A NZ   | LEU | 32.E | O     | LYS | 49.A HZ1   | 3.387 | 2.654 |
| ARG | 56.A NH1  | TPO | 31.E | O2P   | ARG | 56.A HH12  | 2.87  | 1.879 |
| ARG | 56.A NH2  | TPO | 31.E | O1P   | ARG | 56.A HH22  | 3.124 | 2.218 |
| ARG | 56.A NH2  | TPO | 31.E | O2P   | ARG | 56.A HH22  | 3.565 | 2.83  |
| ARG | 127.A NH2 | TPO | 31.E | O3P   | ARG | 127.A HH21 | 3.039 | 2.048 |
| TYR | 128.A OH  | TPO | 31.E | O3P   | TYR | 128.A HH   | 2.949 | 2.049 |
| ASN | 224.A ND2 | HIS | 30.E | O     | ASN | 224.A HD22 | 2.92  | 1.921 |
| LYS | 49.B NZ   | LEU | 32.F | O     | LYS | 49.B HZ3   | 3.317 | 2.614 |
| ARG | 56.B NH1  | TPO | 31.F | O2P   | ARG | 56.B HH12  | 2.777 | 1.78  |
| ARG | 56.B NH2  | TPO | 31.F | O1P   | ARG | 56.B HH22  | 3.008 | 2.132 |
| ARG | 56.B NH2  | TPO | 31.F | O2P   | ARG | 56.B HH22  | 3.528 | 2.817 |
| ARG | 127.B NH2 | TPO | 31.F | O3P   | ARG | 127.B HH22 | 3.133 | 2.125 |
| TYR | 128.B OH  | TPO | 31.F | O3P   | TYR | 128.B HH   | 2.805 | 1.911 |
| ASN | 224.B ND2 | HIS | 30.F | O     | ASN | 224.B HD22 | 3.031 | 2.033 |
| LYS | 49.C NZ   | LEU | 32.G | O     | LYS | 49.C HZ2   | 3.358 | 2.654 |
| ARG | 56.C NH1  | TPO | 31.G | O2P   | ARG | 56.C HH12  | 2.808 | 1.809 |
| ARG | 56.C NH2  | TPO | 31.G | O1P   | ARG | 56.C HH22  | 3.023 | 2.111 |
| ARG | 127.C NH2 | TPO | 31.G | O3P   | ARG | 127.C HH22 | 3.159 | 2.156 |
| TYR | 128.C OH  | TPO | 31.G | O3P   | TYR | 128.C HH   | 2.88  | 1.986 |
| ASN | 224.C ND2 | HIS | 30.G | O     | ASN | 224.C HD22 | 3.055 | 2.056 |
| LYS | 49.D NZ   | LEU | 32.H | O     | LYS | 49.D HZ1   | 3.247 | 2.564 |
| ARG | 56.D NH1  | TPO | 31.H | O2P   | ARG | 56.D HH12  | 2.77  | 1.787 |
| ARG | 56.D NH2  | TPO | 31.H | O1P   | ARG | 56.D HH22  | 3.013 | 2.137 |
| ARG | 56.D NH2  | TPO | 31.H | O2P   | ARG | 56.D HH22  | 3.54  | 2.836 |
| ARG | 127.D NH2 | TPO | 31.H | O3P   | ARG | 127.D HH22 | 3.106 | 2.1   |
| TYR | 128.D OH  | TPO | 31.H | O3P   | TYR | 128.D HH   | 2.744 | 1.849 |
| ASN | 224.D ND2 | HIS | 30.H | O     | ASN | 224.D HD22 | 3.027 | 2.043 |
| ARG | 29.E NH1  | GLU | 180  | A OE1 | ARG | 29.E HH11  | 3.091 | 2.391 |
| HIS | 30.E N    | ASN | 224  | A OD1 | HIS | 30.E H     | 2.831 | 1.836 |
| LEU | 32.E N    | ASN | 173  | A OD1 | LEU | 32.E H     | 2.797 | 1.791 |
| ARG | 29.F NH1  | GLU | 180  | B OE1 | ARG | 29.F HH11  | 2.991 | 2.261 |
| HIS | 30.F N    | ASN | 224  | B OD1 | HIS | 30.F H     | 2.922 | 1.935 |
| LEU | 32.F N    | ASN | 173  | B OD1 | LEU | 32.F H     | 2.774 | 1.768 |
| ARG | 29.G NH1  | GLU | 180  | C OE1 | ARG | 29.G HH11  | 3.092 | 2.36  |
| HIS | 30.G N    | ASN | 224  | C OD1 | HIS | 30.G H     | 2.876 | 1.88  |
| LEU | 32.G N    | ASN | 173  | C OD1 | LEU | 32.G H     | 2.833 | 1.829 |
| ARG | 28.H NH1  | WAT | 6328 | O     | ARG | 28.H HH11  | 3.406 | 2.445 |
| ARG | 29.H NH1  | GLU | 180  | D OE1 | ARG | 29.H HH11  | 2.938 | 2.187 |
| HIS | 30.H N    | ASN | 224  | D OD1 | HIS | 30.H H     | 2.898 | 1.918 |
| LEU | 32.H N    | ASN | 173  | D OD1 | LEU | 32.H H     | 2.696 | 1.703 |
